# Supplementary material for: A first report of East Asian students’ perception of progress testing: a focus group study
Source: PubMed Central journal article supplement (PMC5034519; doi:10.1186/s12909-016-0766-2), 2016-09-22
Supplement: 12909_2016_766_MOESM2_ESM.pdf [file 12909_2016_766_MOESM2_ESM.pdf]

|                       |   |       |       |       |       |      |       |      |       |       |       |       |       |       |       |       |       |       |       |       |       |       |       |       |       |
|-----------------------|---|-------|-------|-------|-------|------|-------|------|-------|-------|-------|-------|-------|-------|-------|-------|-------|-------|-------|-------|-------|-------|-------|-------|-------|
| 72                    | 3 | 0     | 2     | 3     | 0     | 0    | 0     | 0    | 0     | 3     | 3     | 0     | 3     | 3     | 3     | 3     | 2     | 3     | 3     | 1     | 3     | 3     | 2     | 3     |       |
| 73                    | 1 | 0     | 1     | 1     | 5     | 1    | 1     | 1    | 1     | 1     | 1     | 1     | 1     | 0     | 1     | 1     | 1     | 4     | 1     | 1     | 5     | 5     | 1     | 5     |       |
| 74                    | 4 | 0     | 3     | 0     | 3     | 4    | 3     | 0    | 0     | 4     | 4     | 4     | 4     | 3     | 4     | 4     | 5     | 4     | 4     | 3     | 4     | 4     | 4     | 4     |       |
| 75                    | 2 | 1     | 2     | 0     | 2     | 0    | 1     | 0    | 2     | 0     | 2     | 0     | 0     | 2     | 2     | 2     | 2     | 2     | 2     | 0     | 2     | 1     | 2     | 2     |       |
| 76                    | 5 | 5     | 5     | 5     | 5     | 0    | 5     | 0    | 4     | 5     | 5     | 5     | 5     | 5     | 5     | 5     | 5     | 5     | 5     | 5     | 5     | 5     | 5     | 5     |       |
| 77                    | 3 | 0     | 3     | 0     | 4     | 0    | 4     | 0    | 0     | 4     | 4     | 4     | 4     | 5     | 4     | 3     | 3     | 3     | 3     | 1     | 3     | 3     | 3     | 3     |       |
| 78                    | 5 | 0     | 5     | 3     | 3     | 0    | 4     | 0    | 2     | 0     | 0     | 5     | 0     | 5     | 0     | 5     | 2     | 5     | 5     | 0     | 2     | 5     | 5     | 5     |       |
| 79                    | 2 | 0     | 5     | 0     | 0     | 2    | 0     | 0    | 0     | 2     | 4     | 0     | 3     | 5     | 4     | 5     | 1     | 2     | 2     | 2     | 2     | 2     | 5     | 2     |       |
| 80                    | 4 | 0     | 5     | 0     | 3     | 0    | 3     | 0    | 2     | 0     | 5     | 3     | 1     | 0     | 4     | 4     | 0     | 1     | 4     | 4     | 2     | 3     | 4     | 4     |       |
| 81                    | 5 | 5     | 4     | 0     | 5     | 5    | 5     | 2    | 1     | 5     | 5     | 5     | 1     | 5     | 5     | 5     | 5     | 5     | 5     | 4     | 5     | 1     | 5     | 5     |       |
| 82                    | 1 | 0     | 0     | 0     | 0     | 2    | 0     | 0    | 0     | 3     | 3     | 0     | 0     | 2     | 3     | 5     | 5     | 1     | 1     | 1     | 1     | 1     | 0     | 1     |       |
| 83                    | 5 | 0     | 0     | 0     | 0     | 0    | 0     | 0    | 0     | 0     | 4     | 0     | 0     | 4     | 0     | 4     | 4     | 0     | 5     | 5     | 4     | 1     | 0     | 1     |       |
| 84                    | 2 | 0     | 0     | 0     | 0     | 0    | 0     | 0    | 0     | 0     | 4     | 0     | 0     | 0     | 0     | 0     | 0     | 0     | 2     | 2     | 1     | 4     | 0     | 3     |       |
| 85                    | 2 | 0     | 5     | 0     | 5     | 0    | 0     | 0    | 5     | 1     | 5     | 2     | 0     | 2     | 2     | 2     | 5     | 2     | 2     | 2     | 2     | 2     | 0     | 2     |       |
| 86                    | 1 | 0     | 4     | 0     | 0     | 0    | 0     | 0    | 0     | 0     | 2     | 2     | 1     | 0     | 1     | 1     | 2     | 1     | 5     | 0     | 5     | 0     | 1     | 0     |       |
| 87                    | 1 | 0     | 5     | 0     | 0     | 0    | 5     | 0    | 0     | 1     | 1     | 0     | 0     | 0     | 2     | 1     | 1     | 1     | 2     | 5     | 1     | 3     | 5     | 0     |       |
| 88                    | 4 | 0     | 2     | 3     | 0     | 0    | 2     | 0    | 0     | 0     | 2     | 3     | 0     | 0     | 0     | 4     | 0     | 4     | 4     | 2     | 2     | 4     | 3     | 0     |       |
| 89                    | 1 | 0     | 5     | 0     | 0     | 0    | 0     | 0    | 0     | 0     | 0     | 0     | 0     | 0     | 5     | 1     | 1     | 1     | 1     | 3     | 3     | 0     | 0     | 1     |       |
| 90                    | 2 | 0     | 0     | 0     | 0     | 0    | 0     | 0    | 0     | 0     | 0     | 0     | 0     | 0     | 0     | 5     | 2     | 2     | 2     | 4     | 2     | 0     | 0     | 2     |       |
| 91                    | 2 | 0     | 0     | 0     | 3     | 0    | 2     | 0    | 0     | 0     | 2     | 0     | 0     | 0     | 2     | 2     | 0     | 2     | 2     | 5     | 4     | 2     | 0     | 2     |       |
| 92                    | 2 | 0     | 0     | 0     | 0     | 0    | 5     | 0    | 0     | 0     | 4     | 0     | 3     | 0     | 4     | 2     | 2     | 2     | 2     | 2     | 2     | 4     | 3     | 0     |       |
| 93                    | 1 | 0     | 1     | 0     | 1     | 0    | 0     | 0    | 1     | 1     | 4     | 1     | 1     | 5     | 1     | 1     | 1     | 1     | 1     | 1     | 1     | 1     | 1     | 1     |       |
| 94                    | 1 | 0     | 0     | 0     | 0     | 0    | 1     | 0    | 0     | 4     | 5     | 5     | 1     | 1     | 1     | 1     | 1     | 1     | 1     | 1     | 1     | 1     | 1     | 1     |       |
| 95                    | 5 | 0     | 4     | 4     | 3     | 0    | 1     | 0    | 5     | 5     | 4     | 5     | 0     | 0     | 5     | 2     | 1     | 5     | 5     | 5     | 5     | 2     | 5     | 5     |       |
| 96                    | 5 | 0     | 3     | 0     | 0     | 0    | 0     | 0    | 0     | 5     | 4     | 5     | 5     | 0     | 5     | 5     | 0     | 5     | 5     | 5     | 5     | 5     | 0     | 5     |       |
| 97                    | 4 | 0     | 3     | 0     | 0     | 0    | 0     | 0    | 0     | 0     | 3     | 0     | 0     | 5     | 4     | 4     | 4     | 4     | 4     | 4     | 4     | 4     | 0     | 4     |       |
| 98                    | 2 | 2     | 2     | 2     | 2     | 2    | 2     | 0    | 2     | 2     | 2     | 2     | 4     | 2     | 4     | 2     | 2     | 2     | 2     | 2     | 2     | 2     | 0     | 2     |       |
| 99                    | 1 | 0     | 4     | 0     | 0     | 0    | 0     | 0    | 0     | 1     | 2     | 2     | 1     | 1     | 1     | 1     | 1     | 1     | 1     | 1     | 1     | 1     | 0     | 1     |       |
| 100                   | 5 | 0     | 0     | 0     | 0     | 0    | 0     | 0    | 0     | 5     | 5     | 0     | 5     | 0     | 5     | 5     | 5     | 5     | 5     | 5     | 5     | 3     | 5     | 4     |       |
| <b>Correct (%)</b>    |   | 13    | 26    | 17    | 24    | 11   | 22    | 8    | 20    | 47    | 47    | 29    | 25    | 27    | 62    | 58    | 50    | 84    | 90    | 90    | 67    | 70    | 67    | 42    | 90    |
| <b>Incorrect (%)</b>  |   | 3     | 46    | 11    | 22    | 5    | 35    | 6    | 32    | 22    | 48    | 29    | 24    | 29    | 21    | 29    | 30    | 14    | 10    | 5     | 32    | 17    | 23    | 18    | 9     |
| <b>Don't know (%)</b> |   | 84    | 28    | 72    | 54    | 84   | 43    | 86   | 48    | 31    | 5     | 42    | 51    | 44    | 17    | 13    | 20    | 2     | 0     | 5     | 1     | 13    | 10    | 40    | 1     |
| <b>Total</b>          |   | 100   | 100   | 100   | 100   | 100  | 100   | 100  | 100   | 100   | 100   | 100   | 100   | 100   | 100   | 100   | 100   | 100   | 100   | 100   | 100   | 100   | 100   | 100   | 100   |
| <b>Formula score</b>  |   | 12.25 | 14.50 | 14.25 | 18.50 | 9.75 | 13.25 | 6.50 | 12.00 | 41.50 | 35.00 | 21.75 | 19.00 | 19.75 | 56.75 | 50.75 | 42.50 | 80.50 | 87.50 | 88.75 | 59.00 | 65.75 | 61.25 | 37.50 | 87.75 |

| Y2                    | n=8 | Mean  | SD    |
|-----------------------|-----|-------|-------|
| <b>Correct (%)</b>    |     | 17.63 | 6.48  |
| <b>Incorrect (%)</b>  |     | 20.00 | 16.21 |
| <b>Don't know (%)</b> |     | 62.38 | 22.10 |
| <b>Formula score</b>  |     | 12.63 | 3.53  |

| Y3                    | n=8 | Mean  | SD    |
|-----------------------|-----|-------|-------|
| <b>Correct (%)</b>    |     | 43.13 | 14.36 |
| <b>Incorrect (%)</b>  |     | 29.00 | 8.45  |
| <b>Don't know (%)</b> |     | 27.88 | 16.60 |
| <b>Formula score</b>  |     | 35.88 | 14.53 |

| Y5                    | n=8 | Mean  | SD    |
|-----------------------|-----|-------|-------|
| <b>Correct (%)</b>    |     | 75.00 | 16.89 |
| <b>Incorrect (%)</b>  |     | 16.00 | 8.62  |
| <b>Don't know (%)</b> |     | 9.00  | 13.37 |
| <b>Formula score</b>  |     | 71.00 | 18.31 |
